# Supplementary material
Source: PubMed Central journal article supplement (PMC8370208)
Supplement: aac.02646-20-s0001.pdf [file aac.02646-20-s0001.pdf]

- 1 Supplemental Information:
- 2 Six Isolates with Elevated CFDC MICs Tested Alone and in Combination with other
- 3 Gram-negative agents in TKA

R10053

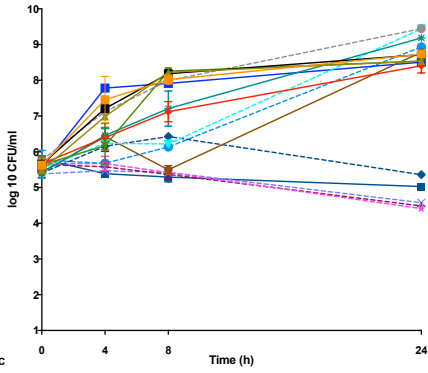

- GC
- FDC
- COL
- AMK
- MEM
- SAM
- CAZ
- TGC
- MIN
- FDC+MIN
- FDC+AMK
- FDC+COL
- FDC+SAM
- FDC+CAZ
- FDC+MEM
- FDC+TGC

R11189

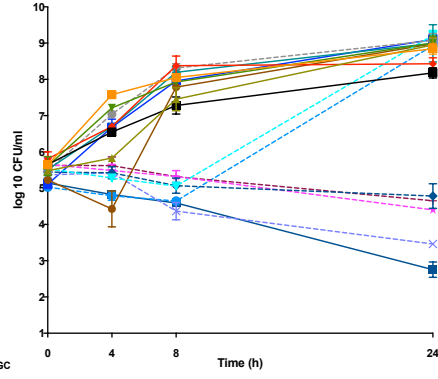

- GC
- FDC
- COL
- AMK
- MEM
- SAM
- CAZ
- TGC
- MIN
- FDC+MIN
- FDC+AMK
- FDC+COL
- FDC+SAM
- FDC+CAZ
- FDC+MEM
- FDC+TGC

4

R11357

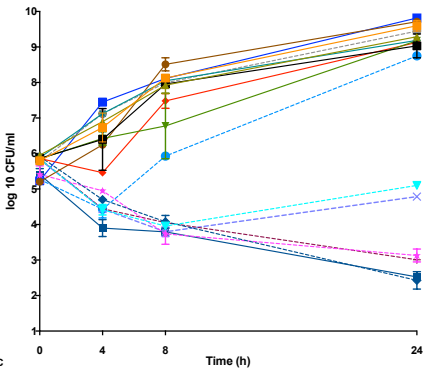

- GC
- FDC
- COL
- AMK
- MEM
- SAM
- CAZ
- TGC
- MIN
- FDC+MIN
- FDC+AMK
- FDC+COL
- FDC+SAM
- FDC+CAZ
- FDC+MEM
- FDC+TGC

R11248

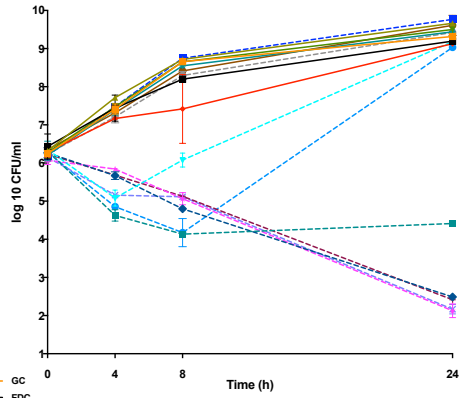

- GC
- FDC
- COL
- AMK
- SAM
- MEM
- TGC
- CAZ
- MIN
- FDC+SAM
- FDC+MIN
- FDC+AMK
- FDC+COL
- FDC+CAZ
- FDC+MEM
- FDC+TGC

5

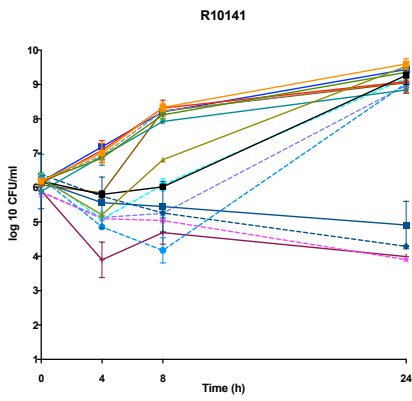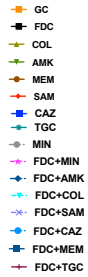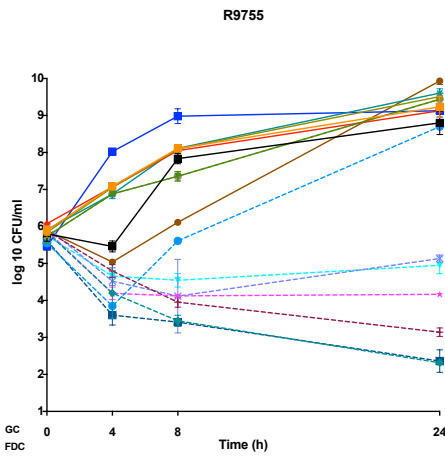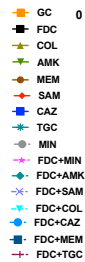

6

7 -CFDC cefiderocol, MEM meropenem, COL colistin, TGC tigecycline, AMK amikacin,  
 8 CAZ ceftazidime, MIN minocycline, SUL sulbactam  
 9 TKA graph legend- orange square GC, black square CFDC, green triangle AMK, brown  
 10 circle MEM, red circle SAM, Blue square CAZ, dark green circle TGC, gray circle MIN,  
 11 pink star CFDC + MIN, dark green diamond CFDC +AMK, turquoise diamond  
 12 CFDC+COL, purple star CFDC + SAM, blue circle CFDC+CAZ, blue square CFDC  
 13 +MEM, red plus sign, CFDC +TGC

14

15

16

17
